# Supplementary material for: Specific Lymphocyte Subsets Predict Response to Adoptive Cell Therapy Using Expanded Autologous Tumor-Infiltrating Lymphocytes in Metastatic Melanoma Patients
Source: Oxford University Press journal article supplement (doi:10.1158/1078-0432.ccr-12-1177), 2012-10-02
Supplement: 10780432ccr121177-sup-tab2.pdf [file 10780432ccr121177-sup-tab2.pdf]

**Table S2. Derivation of the irRC best overall score**

| <b>Measureable response</b>                | <b>Non-measureable response</b> |                       | <b>Overall response</b> |
|--------------------------------------------|---------------------------------|-----------------------|-------------------------|
| <b>Index and new M<sup>a</sup> lesions</b> | <b>Non-index lesions</b>        | <b>New NM lesions</b> |                         |
| Decrease 100%                              | No                              | No                    | irCR                    |
| Decrease 100%                              | Stable                          | Any                   | irPR                    |
| Decrease 100%                              | Progression                     | Any                   | irPR                    |
| Decrease ≥50%                              | No/Stable                       | Any                   | irPR                    |
| Decrease ≥50%                              | Progression                     | Any                   | irPR                    |
| Decrease ≥50 to <25%                       | No/Stable                       | Any                   | irSD                    |
| Decrease ≤50 to <25%                       | Progression                     | Any                   | irSD                    |
| Increase ≥25%                              | Any                             | Any                   | irPD                    |

<sup>a</sup>Abbreviations: M, measureable disease; NM, non-measureable disease; irRC, immune related response criteria.
